# Supplementary material for: Detecting Undifferentiation of Tertiary and County Hospitals in China in Adoption of DRG Instrument
Source: Healthcare (Basel). 2021 Jul 21;9(8):922. doi: 10.3390/healthcare9080922 (PMC8393376; doi:10.3390/healthcare9080922)
Supplement: Supplementary file 1 [file healthcare-09-00922-s001.zip › healthcare-1201853-supplementary.pdf]

**Table S1.** DRGs with cost in county hospitals significantly lower.

| DRG                                                                     | RW   | MR    | Risk Group     | Level          | Inpatient Cost                |
|-------------------------------------------------------------------------|------|-------|----------------|----------------|-------------------------------|
| Cerebral ischemic diseases with comorbidities (BR23)                    | 0.97 | 0.12% | Low            | city<br>county | 9.02 ± 9.99<br>6.47 ± 6.04    |
| Cerebral ischemic diseases without comorbidities (BR25)                 | 0.74 | 0.19% | Low-middle     | city<br>county | 9.97 ± 12.28<br>6.43 ± 5.89   |
| Other infections of the nervous system with severe comorbidities (BT21) | 1.91 | 0.45% | Low-middle     | city<br>county | 12.3 ± 13.99<br>3.84 ± 7.59   |
| Other infections of the nervous system without comorbidities (BT25)     | 1.8  | 0.13% | Low            | city<br>county | 9.04 ± 15.28<br>2.62 ± 5.52   |
| Epilepsy with severe comorbidities (BV11)                               | 1.55 | 0%    | Zero-mortality | city<br>county | 11.44 ± 11.11<br>6.88 ± 11.63 |
| Epilepsy with comorbidities (BV13)                                      | 0.91 | 0.53% | Low-middle     | city<br>county | 9.48 ± 13.14<br>6.06 ± 7.36   |
| Headache (BV39)                                                         | 0.64 | 0%    | Zero-mortality | city<br>county | 5.44 ± 5.48<br>4.27 ± 1.85    |
| Brain dysfunction without comorbidities (BX15)                          | 1.54 | 0.22% | Low-middle     | city<br>county | 16.24 ± 22.85<br>8.59 ± 7.97  |
| Peripheral neuropathy with comorbidities (BX23)                         | 0.91 | 0.15% | Low            | city<br>county | 8.87 ± 11.87<br>5.35 ± 3.46   |
| Peripheral neuropathy without comorbidities (BX25)                      | 0.67 | 0.43% | Low-middle     | city<br>county | 7.85 ± 10.5<br>5.98 ± 6.81    |
| Vitrectomy and retinal surgery (CB19)                                   | 0.55 | 0%    | Zero-mortality | city<br>county | 10.73 ± 6.24<br>6.8 ± 4.18    |
| Lens surgery (CB39)                                                     | 0.32 | 0%    | Zero-mortality | city<br>county | 6.88 ± 1.22<br>6.25 ± 3.16    |
| Various types of cataract (CW19)                                        | 0.17 | 0%    | Zero-mortality | city<br>county | 7.95 ± 8.2<br>6.11 ± 2.39     |
| Other diseases cause eye diseases (CX19)                                | 0.77 | 0%    | Zero-mortality | city<br>county | 8.16 ± 8.03<br>5.36 ± 3.1     |
| Other eye diseases without comorbidities (CZ15)                         | 0.35 | 0%    | Zero-mortality | city<br>county | 8.96 ± 21.84<br>2.65 ± 2.48   |
| Other external ear and ear surgery (DC29)                               | 0.79 | 0%    | Zero-mortality | city<br>county | 6.3 ± 3.39<br>3.88 ± 1.62     |

|                                                                                 |      |       |                |                |                                |
|---------------------------------------------------------------------------------|------|-------|----------------|----------------|--------------------------------|
| Nasal cavity and sinus surgery (DD29)                                           | 0.81 | 0%    | Zero-mortality | city<br>county | 10.06 ± 5.18<br>8.41 ± 3.06    |
| Tonsillectomy and / or adenoidectomy in age < 17 (DE20)                         | 0.88 | 0%    | Zero-mortality | city<br>county | 7.75 ± 1.52<br>7.14 ± 1.26     |
| Medium sized oral surgery without comorbidities (DG25)                          | 0.64 | 0%    | Zero-mortality | city<br>county | 10.33 ± 7.12<br>5.77 ± 3.42    |
| Imbalance and hearing impairment (DS19)                                         | 0.62 | 0.05% | Low            | city<br>county | 6.38 ± 9.4<br>4.2 ± 2.52       |
| Otitis media and upper respiratory tract infection in age < 17 (DT10)           | 0.43 | 0.01% | Low            | city<br>county | 3.24 ± 3.4<br>1.68 ± 1.04      |
| Otitis media and upper respiratory tract infection with comorbidities (DT13)    | 0.58 | 0%    | Zero-mortality | city<br>county | 11.19 ± 16.18<br>5.12 ± 6.34   |
| Otitis media and upper respiratory tract infection without comorbidities (DT15) | 0.31 | 0.14% | Low            | city<br>county | 10.94 ± 18.7<br>4.64 ± 3.88    |
| Epiglottitis, laryngitis and tracheitis (DT29)                                  | 0.39 | 0%    | Zero-mortality | city<br>county | 7.09 ± 14.39<br>1.98 ± 1.41    |
| Oral and dental diseases without comorbidities (DX15)                           | 0.29 | 0.11% | Low            | city<br>county | 6.42 ± 10.91<br>3.33 ± 2.81    |
| Major thoracic surgery without comorbidities (EB15)                             | 2.29 | 0.30% | Low-middle     | city<br>county | 38.31 ± 21.94<br>32.99 ± 14.04 |
| Respiratory infection / inflammation in age < 17 (ES10)                         | 0.86 | 0.01% | Low            | city<br>county | 5.62 ± 4.77<br>2.48 ± 1.26     |
| Chronic airway obstruction with severe comorbidities (ET11)                     | 1.49 | 0.68% | Low-middle     | city<br>county | 13.47 ± 14.08<br>9.16 ± 10.36  |
| Chronic airway obstruction without comorbidities (ET15)                         | 0.8  | 0.40% | Low-middle     | city<br>county | 8.94 ± 9.73<br>7.24 ± 6.44     |
| Respiratory symptoms and signs with comorbidities (EV13)                        | 0.76 | 0.57% | Low-middle     | city<br>county | 10.05 ± 13.52<br>7.17 ± 9.61   |
| Interstitial lung disease without comorbidities (EW25)                          | 1.36 | 0.49% | Low-middle     | city<br>county | 8.5 ± 5.68<br>6.92 ± 7.02      |
| Bronchitis and asthma in age < 17 (EX10)                                        | 0.48 | 0%    | Zero-mortality | city<br>county | 4.54 ± 3.84<br>2.24 ± 0.93     |
| Bronchitis and asthma with comorbidities (EX13)                                 | 0.9  | 0.13% | Low            | city<br>county | 9.29 ± 15.91<br>6.14 ± 6.7     |
| Bronchitis and asthma without comorbidities (EX15)                              | 0.71 | 0.11% | Low            | city<br>county | 8.03 ± 9.33<br>5.22 ± 3.78     |

|                                                                           |      |       |                |                |                              |
|---------------------------------------------------------------------------|------|-------|----------------|----------------|------------------------------|
| Atherosclerosis with comorbidities (FS23)                                 | 0.83 | 0.37% | Low-middle     | city<br>county | 9.66 ± 14.35<br>7.89 ± 10.96 |
| Hypertension without comorbidities (FT25)                                 | 0.63 | 0.09% | Low            | city<br>county | 9.63 ± 14.46<br>6.84 ± 7.94  |
| Valvular diseases without comorbidities (FU15)                            | 0.85 | 0.77% | Low-middle     | city<br>county | 8.72 ± 11.22<br>5.91 ± 5.93  |
| Arrhythmia and conduction disorder without comorbidities (FU35)           | 0.56 | 0.21% | Low-middle     | city<br>county | 7.72 ± 10.29<br>5.67 ± 6.38  |
| Syncope and / or collapse without comorbidities (FV25)                    | 0.65 | 0%    | Zero-mortality | city<br>county | 6.03 ± 5.87<br>4.54 ± 3.63   |
| Other diseases of circulatory system with severe comorbidities (FZ11)     | 1.32 | 0.63% | Low-middle     | city<br>county | 11.68 ± 15.07<br>9.9 ± 12.79 |
| Other diseases of circulatory system with comorbidities (FZ13)            | 1.3  | 0.60% | Low-middle     | city<br>county | 9.87 ± 11.31<br>6.52 ± 6.76  |
| Other diseases of circulatory system without comorbidities (FZ15)         | 0.74 | 0.30% | Low-middle     | city<br>county | 6.33 ± 7.47<br>4.19 ± 5.13   |
| Operation of anus and alimentary tract stoma with comorbidities (GC23)    | 0.84 | 0%    | Zero-mortality | city<br>county | 11.81 ± 7.08<br>7.28 ± 2.62  |
| Operation of anus and alimentary tract stoma without comorbidities (GC25) | 0.58 | 0%    | Zero-mortality | city<br>county | 9.08 ± 3.46<br>6.76 ± 2.04   |
| Appendectomy with complex diagnosis without comorbidities (GD15)          | 0.63 | 0%    | Zero-mortality | city<br>county | 12.39 ± 2.48<br>10.26 ± 3.57 |
| Inguinal and abdominal hernia surgery in age < 17 (GE10)                  | 0.29 | 0%    | Zero-mortality | city<br>county | 6.99 ± 1.27<br>5.11 ± 1.42   |
| Inguinal and abdominal hernia surgery with comorbidities (GE13)           | 0.5  | 0%    | Zero-mortality | city<br>county | 12.63 ± 5.74<br>9.8 ± 5.62   |
| Inguinal and abdominal hernia surgery without comorbidities (GE15)        | 0.38 | 0.12% | Low            | city<br>county | 10.62 ± 11.32<br>8.39 ± 3    |
| Inflammatory bowel disease (GT19)                                         | 0.81 | 0%    | Zero-mortality | city<br>county | 6.91 ± 6.2<br>4.31 ± 3.25    |
| Esophagitis and gastroenteritis without comorbidities (GU15)              | 0.55 | 0.10% | Low            | city<br>county | 6.93 ± 8.48<br>4.92 ± 4.64   |
| Peptic ulcer without comorbidities (GV29)                                 | 0.55 | 0.31% | Low-middle     | city<br>county | 7.93 ± 7.11<br>5.16 ± 4.24   |
| Digestive tract obstruction or abdominal pain with comorbidities (GW13)   | 0.89 | 0.61% | Low-middle     | city<br>county | 9.9 ± 13.24<br>5.69 ± 7.6    |

|                                                                            |      |       |                |                |                                |
|----------------------------------------------------------------------------|------|-------|----------------|----------------|--------------------------------|
| Digestive tract obstruction or abdominal pain without comorbidities (GW15) | 0.45 | 0.24% | Low-middle     | city<br>county | 8.52 ± 16.66<br>4.86 ± 5.55    |
| Special diseases of digestive system (GX19)                                | 0.91 | 0.22% | Low-middle     | city<br>county | 8.71 ± 9.02<br>3.4 ± 5.16      |
| Other diseases of digestive system with comorbidities (GZ13)               | 0.64 | 0.19% | Low-middle     | city<br>county | 7.48 ± 10.44<br>5.26 ± 5.54    |
| Other diseases of digestive system without comorbidities (GZ15)            | 0.38 | 0.11% | Low            | city<br>county | 8.72 ± 12.26<br>5.65 ± 4.2     |
| acute pancreatitis with severe comorbidities (HT21)                        | 1.12 | 0.77% | Low-middle     | city<br>county | 15.43 ± 15.06<br>9.59 ± 6.36   |
| acute pancreatitis without comorbidities (HT25)                            | 0.82 | 0.12% | Low            | city<br>county | 13.77 ± 12.21<br>7.55 ± 6.57   |
| Acute biliary diseases with severe comorbidities (HU11)                    | 1.9  | 0.47% | Low-middle     | city<br>county | 10.54 ± 12.34<br>8.6 ± 7.64    |
| Acute biliary diseases with comorbidities (HU13)                           | 0.74 | 0.14% | Low            | city<br>county | 10.76 ± 11.74<br>7.26 ± 6.54   |
| Liver cirrhosis and alcoholic hepatitis without comorbidities (HV15)       | 0.74 | 0.73% | Low-middle     | city<br>county | 10.12 ± 10.33<br>7.34 ± 7.42   |
| Other liver diseases with severe comorbidities (HZ11)                      | 1.16 | 0%    | Zero-mortality | city<br>county | 9.38 ± 8.07<br>8.63 ± 11.82    |
| Other liver diseases without comorbidities (HZ15)                          | 0.72 | 0.14% | Low            | city<br>county | 8.69 ± 15.93<br>6.82 ± 7.19    |
| Other diseases of biliary tract with comorbidities (HZ23)                  | 0.67 | 0.42% | Low-middle     | city<br>county | 10.24 ± 9.62<br>8.72 ± 9.06    |
| Major joint replacement without comorbidities (IC15)                       | 2.1  | 0%    | Zero-mortality | city<br>county | 44.49 ± 11.21<br>33.04 ± 11.64 |
| Upper limb long bone surgery in age < 17 (IF10)                            | 0.62 | 0%    | Zero-mortality | city<br>county | 11.75 ± 6.27<br>10.66 ± 6.44   |
| Upper limb long bone surgery with comorbidities (IF13)                     | 1.38 | 0%    | Zero-mortality | city<br>county | 24.75 ± 17<br>18.39 ± 6.38     |
| Upper limb long bone surgery without comorbidities (IF15)                  | 0.96 | 0%    | Zero-mortality | city<br>county | 16.54 ± 11.49<br>13.23 ± 6.32  |
| Lower limbs long bone surgery with comorbidities (IF23)                    | 2.5  | 0%    | Zero-mortality | city<br>county | 37.39 ± 18.99<br>25.98 ± 11.52 |
| Lower limbs long bone surgery without comorbidities (IF25)                 | 1.4  | 0.22% | Low-middle     | city<br>county | 27.93 ± 20.85<br>20.17 ± 10.52 |

|                                                                                                   |      |       |                |                |                              |
|---------------------------------------------------------------------------------------------------|------|-------|----------------|----------------|------------------------------|
| Muscle and tendon surgery without comorbidities (IG15)                                            | 0.47 | 0%    | Zero-mortality | city<br>county | 10.05 ± 11.83<br>6.22 ± 7.09 |
| Transplantation or debridement without comorbidities (IH25)                                       | 0.56 | 0%    | Zero-mortality | city<br>county | 8.83 ± 8.99<br>7.52 ± 7.42   |
| Removal of fixator for long bone and facet joint without comorbidities (IH35)                     | 0.43 | 0%    | Zero-mortality | city<br>county | 6.45 ± 3.26<br>5.95 ± 2.97   |
| Chronic inflammatory musculoskeletal and connective tissue disorders with comorbidities (IT23)    | 0.87 | 0%    | Zero-mortality | city<br>county | 8.69 ± 11.74<br>6.53 ± 6.45  |
| Chronic inflammatory musculoskeletal and connective tissue disorders without comorbidities (IT25) | 0.58 | 0.09% | Low            | city<br>county | 8.71 ± 14.45<br>7.08 ± 11.7  |
| Total mastectomy for malignant breast tumor without comorbidities (JA15)                          | 1.1  | 0%    | Zero-mortality | city<br>county | 18.79 ± 7.56<br>15.53 ± 2.61 |
| Ulceration and cellulitis with comorbidities (JD25)                                               | 0.83 | 0%    | Zero-mortality | city<br>county | 10.94 ± 11.71<br>6.49 ± 4.25 |
| Other operations of skin and subcutaneous tissue with comorbidities (JJ13)                        | 0.65 | 0%    | Zero-mortality | city<br>county | 12.44 ± 13.91<br>5.09 ± 3.53 |
| Other operations of skin and subcutaneous tissue without comorbidities (JJ15)                     | 0.37 | 0.05% | Low            | city<br>county | 7.79 ± 8.04<br>4.48 ± 2.82   |
| Malignant tumor of breast without comorbidities (JR15)                                            | 0.81 | 0.45% | Low-middle     | city<br>county | 9.53 ± 10.87<br>5.02 ± 5.82  |
| Severe skin disease with comorbidities (JV13)                                                     | 1.1  | 0.44% | Low-middle     | city<br>county | 10.11 ± 18.57<br>5.08 ± 5.87 |
| Severe skin disease without comorbidities (JV15)                                                  | 0.65 | 0.36% | Low-middle     | city<br>county | 8.88 ± 14.56<br>4.39 ± 7.11  |
| Dermatitis or eczema (JV29)                                                                       | 0.56 | 0.37% | Low-middle     | city<br>county | 7.8 ± 13.55<br>2.83 ± 2.42   |
| Cellulitis and other infectious skin diseases without comorbidities (JV35)                        | 0.68 | 0.11% | Low            | city<br>county | 8.45 ± 11.8<br>3.94 ± 4.03   |
| Mild skin diseases without comorbidities (JV45)                                                   | 0.41 | 0%    | Zero-mortality | city<br>county | 7.01 ± 16.42<br>3.55 ± 3.65  |
| Major thyroidectomy (KD19)                                                                        | 0.86 | 0.23% | Low-middle     | city<br>county | 17.79 ± 6.69<br>13.25 ± 3.25 |
| Endocrine disorders with severe comorbidities (KT11)                                              | 0.82 | 0.27% | Low-middle     | city<br>county | 9.77 ± 19.58<br>5.8 ± 4.9    |
| Other urological operations without comorbidities (LJ15)                                          | 0.48 | 0%    | Zero-mortality | city<br>county | 11.11 ± 8.25<br>6.87 ± 6.98  |

|                                                                                                                                         |      |       |                |                |                              |
|-----------------------------------------------------------------------------------------------------------------------------------------|------|-------|----------------|----------------|------------------------------|
| Nephritis and nephropathy with severe comorbidities (LS11)                                                                              | 0.94 | 0.31% | Low-middle     | city<br>county | 9.36 ± 11.45<br>5.84 ± 3.74  |
| Nephritis and nephropathy with comorbidities (LS13)                                                                                     | 0.8  | 0.17% | Low-middle     | city<br>county | 8.03 ± 10.88<br>3.56 ± 3.06  |
| Urinary tract infection with comorbidities (LU13)                                                                                       | 0.87 | 0.19% | Low-middle     | city<br>county | 8.87 ± 11.51<br>5.34 ± 9     |
| Urinary tract infection without comorbidities (LU15)                                                                                    | 0.56 | 0%    | Zero-mortality | city<br>county | 6.09 ± 6.23<br>4.44 ± 4.91   |
| Urinary calculi or obstruction and urethral stricture (LW19)                                                                            | 0.38 | 0.03% | Low            | city<br>county | 6.53 ± 11.77<br>3.29 ± 4.01  |
| Other diseases of urinary system without comorbidities (LZ15)                                                                           | 0.34 | 0%    | Zero-mortality | city<br>county | 6.89 ± 7.17<br>5.28 ± 4.96   |
| Surgery for non-malignant lesions of testis in age < 17 (MB10)                                                                          | 0.35 | 0%    | Zero-mortality | city<br>county | 7.08 ± 1.43<br>5.42 ± 1.43   |
| Prostatectomy with comorbidities (MC13)                                                                                                 | 1.34 | 0%    | Zero-mortality | city<br>county | 20.43 ± 4.46<br>17.99 ± 4.22 |
| Other male reproductive system surgery without comorbidities (MJ15)                                                                     | 0.31 | 0%    | Zero-mortality | city<br>county | 6.58 ± 4.14<br>5.01 ± 2.2    |
| Other diseases of male reproductive system (MZ19)                                                                                       | 0.63 | 0.19% | Low-middle     | city<br>county | 7.42 ± 13.55<br>5.68 ± 6.22  |
| Reconstruction of female reproductive system (NB19)                                                                                     | 0.86 | 0%    | Zero-mortality | city<br>county | 18.17 ± 6.59<br>11.41 ± 3.28 |
| Uterine surgery for carcinoma in situ and non-malignant lesions (except ectopic pregnancy) without comorbidities (NC15)                 | 0.81 | 0%    | Zero-mortality | city<br>county | 14.33 ± 3.11<br>12.53 ± 3.85 |
| Surgery for carcinoma in situ and non-malignant lesions (except ectopic pregnancy) other than uterine surgery with comorbidities (ND13) | 0.6  | 0%    | Zero-mortality | city<br>county | 11.06 ± 6.69<br>9.43 ± 3.13  |
| Operation of vulva, vagina and cervix (NE19)                                                                                            | 0.31 | 0%    | Zero-mortality | city<br>county | 7.76 ± 4.98<br>4.95 ± 2.97   |
| Malignant tumor of female reproductive system without comorbidities (NR15)                                                              | 0.81 | 0.57% | Low-middle     | city<br>county | 15.92 ± 25.83<br>7.36 ± 6.32 |
| Cesarean section with uterine and / or adnexal surgery (OB19)                                                                           | 0.84 | 0.05% | Low            | city<br>county | 9.24 ± 4.81<br>9.08 ± 4.36   |
| Cesarean section with severe comorbidities (OB21)                                                                                       | 0.99 | 0.13% | Low            | city<br>county | 11.49 ± 7.32<br>10.5 ± 8.83  |
| Vaginal delivery with surgery with comorbidities (OC13)                                                                                 | 0.6  | 0%    | Zero-mortality | city<br>county | 5.66 ± 3.95<br>4.59 ± 1.75   |

|                                                                                              |      |       |                |                |                               |
|----------------------------------------------------------------------------------------------|------|-------|----------------|----------------|-------------------------------|
| Vaginal delivery with surgery without comorbidities (OC15)                                   | 0.54 | 0.08% | Low            | city<br>county | 5.39 ± 4.27<br>3.94 ± 1.39    |
| Abortion with cervical dilatation and curettage or hysterectomy without comorbidities (OD35) | 0.17 | 0%    | Zero-mortality | city<br>county | 5.96 ± 3.79<br>1.91 ± 1.1     |
| Abortion outside operating room without comorbidities (OS25)                                 | 0.24 | 0.09% | Low            | city<br>county | 4.32 ± 5.47<br>1.86 ± 1.13    |
| Preterm or false labor with comorbidities (OU13)                                             | 0.45 | 0%    | Zero-mortality | city<br>county | 3.09 ± 3.95<br>1.28 ± 0.87    |
| Preterm or false labor without comorbidities (OU15)                                          | 0.31 | 0%    | Zero-mortality | city<br>county | 1.81 ± 1.3<br>1.34 ± 0.86     |
| Term birth (weight > 2499g) with serious problems (PU11)                                     | 0.88 | 0.05% | Low            | city<br>county | 4.27 ± 4.6<br>2.31 ± 1.18     |
| Term birth (weight > 2499g) with other problems (PU13)                                       | 0.69 | 0%    | Zero-mortality | city<br>county | 4.13 ± 2.19<br>2.96 ± 1.87    |
| Abnormal hemogram with comorbidities (QS13)                                                  | 0.49 | 0.50% | Low-middle     | city<br>county | 8.78 ± 11.97<br>5.78 ± 4.89   |
| Coagulation disorders (QT19)                                                                 | 0.8  | 0%    | Zero-mortality | city<br>county | 6.37 ± 8.14<br>3.98 ± 4.19    |
| Supportive treatment of malignant proliferative diseases within 3 days (RU12)                | 1.35 | 0.03% | Low            | city<br>county | 15.04 ± 14.67<br>8.95 ± 5.14  |
| Radiotherapy and other treatments for malignant proliferative diseases (RV19)                | 2.6  | 0%    | Zero-mortality | city<br>county | 30.35 ± 24.64<br>19.03 ± 9.93 |
| Sepsis with severe comorbidities (SR11)                                                      | 3.19 | 0.19% | Low-middle     | city<br>county | 8.99 ± 14.3<br>5.7 ± 11.04    |
| Sepsis without comorbidities (SR15)                                                          | 2.1  | 0.17% | Low-middle     | city<br>county | 4.24 ± 9.03<br>2.05 ± 2.22    |
| Viral diseases with comorbidities (ST13)                                                     | 1.28 | 0%    | Zero-mortality | city<br>county | 8.51 ± 10.82<br>2.74 ± 2.23   |
| Other infectious and parasitic diseases with severe comorbidities (SZ11)                     | 2.14 | 0.17% | Low-middle     | city<br>county | 11.49 ± 16.03<br>3.86 ± 5.63  |
| Other infectious and parasitic diseases with comorbidities (SZ13)                            | 1.29 | 0%    | Zero-mortality | city<br>county | 8.51 ± 6.24<br>3.37 ± 2.76    |
| Other infectious and parasitic diseases without comorbidities (SZ15)                         | 0.43 | 0%    | Zero-mortality | city<br>county | 7.91 ± 5.44<br>3.73 ± 2.91    |
| Injury related debridement without comorbidities (VC15)                                      | 0.52 | 0%    | Zero-mortality | city<br>county | 18.46 ± 18.1<br>6.85 ± 9.34   |

|                                                                           |      |       |                |                |                                |
|---------------------------------------------------------------------------|------|-------|----------------|----------------|--------------------------------|
| Hand injury surgery (VD19)                                                | 0.77 | 0%    | Zero-mortality | city<br>county | 22.62 ± 29.58<br>6.41 ± 3.16   |
| Damage without comorbidities (VR15)                                       | 0.54 | 0.23% | Low-middle     | city<br>county | 7.05 ± 7.9<br>5.52 ± 6.72      |
| Toxic reaction of drugs and other substances without comorbidities (VS25) | 0.53 | 0.74% | Low-middle     | city<br>county | 5.37 ± 6.06<br>5 ± 9.02        |
| Other burn without comorbidities (WZ15)                                   | 0.5  | 0.28% | Low-middle     | city<br>county | 5.21 ± 2.85<br>4.28 ± 9.13     |
| Rehabilitation without comorbidities (XR15)                               | 1.27 | 0%    | Zero-mortality | city<br>county | 24.93 ± 22.63<br>10.34 ± 11.38 |

DRGs only with cost in county hospitals significantly lower were displayed at this table. DRG: diagnosis related group; RW: related weight; MR: mortality rate.

**Table S2.** Reasons of exclusion between two level hospitals.

| Reason                                               | Level  | Total Number of Cases | Distribution    | <i>p</i> Value |
|------------------------------------------------------|--------|-----------------------|-----------------|----------------|
| Newborn cases without weight information             | city   | 10,189                | 295 (2.9%)      | 0.978          |
|                                                      | county | 45,384                | 1309 (2.88%)    |                |
| Missing or irregulated coding of principle diagnosis | city   | 10,189                | 6373 (62.55%)   | 0.151          |
|                                                      | county | 45,384                | 28,037 (61.78%) |                |
| Total in-hospital cost lower than 50 yuan            | city   | 10,189                | 1881 (18.46%)   | 0.939          |
|                                                      | county | 45,384                | 8361 (18.42%)   |                |
| Length of stay over 60 days                          | city   | 10,189                | 1109 (10.88%)   | 0.499          |
|                                                      | county | 45,384                | 5048 (11.12%)   |                |
| Codes of diagnosis and operation not match           | city   | 10,189                | 357 (3.5%)      | 0.728          |
|                                                      | county | 45,384                | 1625 (3.58%)    |                |
| Diagnosis of pregnancy with age over 50              | city   | 10,189                | 276 (2.71%)     | 0.705          |
|                                                      | county | 45,384                | 1263 (2.78%)    |                |
| Palliative treatment for malignant tumor cases       | city   | 10,189                | 172 (1.69%)     | 0.138          |
|                                                      | county | 45,384                | 673 (1.48%)     |                |

Number of cases occurred and percentage in each level of hospitals for the reasons were displayed as Distribution.
